# Supplementary material for: Catechin supplemented in a FOS diet induces weight loss by altering cecal microbiota and gene expression of colonic epithelial cells
Source: Royal Society of Chemistry journal article supplement (doi:10.1039/c8fo00035b), 2018-01-01
Supplement: c8fo00035b1.pdf [file c8fo00035b1.pdf]

## 1 Supplemental Table

2 Table S1 Significantly enriched KEGG pathways by differentially expressed genes of Group

3 FOS\_H versus Group FOS

| Enriched KEGG pathways                               | $-\log 2 \times \text{corrected } P$ |
|------------------------------------------------------|--------------------------------------|
| B cell receptor signaling pathway                    | 2.64                                 |
| Tryptophan metabolism                                | 1.83                                 |
| Intestinal immune network for IgA production         | 1.79                                 |
| Drug metabolism - cytochrome P450                    | 1.49                                 |
| Metabolism of xenobiotics by cytochrome P450         | 1.49                                 |
| Fat digestion and absorption                         | 1.49                                 |
| NF-kappa B signaling pathway                         | 1.48                                 |
| Cell adhesion molecules (CAMs)                       | 1.11                                 |
| Hematopoietic cell lineage                           | 1.11                                 |
| AGE-RAGE signaling pathway in diabetic complications | 1.11                                 |
| Regulation of lipolysis in adipocytes                | 1.11                                 |
| Vitamin digestion and absorption                     | 1.08                                 |

4

5
